# Supplementary material for: Pretreatments for enhancing sewage sludge reduction and reuse in lipid production
Source: Research Square preprint supplement (doi:10.21203/rs.3.rs-54106/v3), 2020-11-18
Supplement: Supplementary file 1 [file 21f88af2c29724ec0538c6e8.docx]

**Graphical abstract**

Wastewater sludge

Acidic

Alkali

Microwave

Ultrasonication

**Pretreatment**

**Fermentation**

(Lipid production)

Lipid

Residue

**Sludge reduction: 63%**

**Lipid yield: 0.21 g lipid/g MLSS**

(Lipid production)


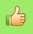


**Biodiesel**
